## Largely distinct networks mediate perceptually-relevant auditory and visual speech representations

Anne Keitel<sup>\*1,2</sup>, Joachim Gross<sup>1,3</sup>, Christoph Kayser<sup>4</sup>

- 1) Institute of Neuroscience and Psychology, University of Glasgow, 62 Hillhead Street, Glasgow G12 8QB, UK
- 2) Psychology, University of Dundee, Scrymgeour Building, Dundee DD1 4HN, UK
- 3) Institute for Biomagnetism and Biosignalanalysis, University of Münster, Malmedyweg 15, 48149 Münster, Germany
- 4) Department for Cognitive Neuroscience & Cognitive Interaction Technology, Center of Excellence, Bielefeld University, 33615 Bielefeld, Germany

\* *Corresponding author:* Anne Keitel, Psychology, School of Social Sciences, Scrymgeour Building, Dundee DD1 4HN, UK

Tel.: +44 (0)1382 386 754

E-mail: [a.keitel@dundee.ac.uk](mailto:a.keitel@dundee.ac.uk)

*Acknowledgements:* This research was supported by the UK Biotechnology and Biological Sciences Research Council (BBSRC, BB/L027534/1). CK is supported by the European Research Council (ERC-2014-CoG; grant No 646657); JG by the Wellcome Trust (Joint Senior Investigator Grant, No 098433). The authors declare no competing financial interests.

1 *Abstract*

2 Visual speech is an integral part of communication. Yet it remains unclear whether semantic  
3 information carried by movements of the lips or tongue is represented in the same brain regions  
4 that mediate acoustic speech representations. Behaviourally, our ability to understand  
5 acoustic speech seems independent from that to understand visual speech, but neuroimaging  
6 studies suggest that acoustic and visual speech representations largely overlap. To resolve  
7 this discrepancy, and to understand whether acoustic and lip-reading speech comprehension  
8 are mediated by the same cerebral representations, we systematically probed where the brain  
9 represents acoustically and visually conveyed word identities in a human MEG study. We  
10 designed a single-trial classification paradigm to dissociate where cerebral representations  
11 merely reflect the sensory stimulus and where they are predictive of the participant's percept.  
12 In general, those brain regions allowing for the highest word classification were distinct from  
13 those in which cerebral representations were predictive of participant's percept. Across the  
14 brain, word representations were largely modality-specific and auditory and visual  
15 comprehension were mediated by distinct left-lateralised ventral and dorsal fronto-temporal  
16 regions, respectively. Only within the inferior frontal gyrus and the anterior temporal lobe did  
17 auditory and visual representations converge. These results provide a neural explanation for  
18 why acoustic speech comprehension is a poor predictor of lip-reading skills and suggests that  
19 those cerebral speech representations that encode word identity may be more modality-  
20 specific than often upheld.

21

22 *Words abstract: 226.*

23

24

25

26 Keywords: visual speech, speech decoding, MEG, lip reading, speech reading, auditory  
27 pathways, audio-visual integration

## 28 Introduction

29 Acoustic and visual speech signals are both elemental for everyday communication. While  
30 acoustic speech consists of temporal and spectral modulations of sound pressure, visual  
31 speech consists of movements of the mouth, head, and hands. Movements of the lips, teeth  
32 and tongue in particular provide both redundant and complementary information to acoustic  
33 cues (Hall, Fussell, & Summerfield, 2005; Peelle & Sommers, 2015; Summerfield, 1992), and  
34 can help to enhance speech intelligibility in noisy environments or in a second language  
35 (Navarra & Soto-Faraco, 2007; Sumbly & Pollack, 1954; Yi, Wong, & Eizenman, 2013). While  
36 a plethora of studies have investigated the cerebral mechanisms underlying speech in general,  
37 we still have a limited understanding of the networks specifically mediating visual speech  
38 perception, i.e. lip-reading (Bernstein & Liebenthal, 2014; Capek et al., 2008; Crosse, ElShafei,  
39 Foxe, & Lalor, 2015). In particular, it remains unclear whether visual speech signals are largely  
40 represented in specific and dedicated regions, or whether these visual signals are encoded by  
41 the same networks that mediate auditory speech perception.

42 Behaviourally, our ability to understand acoustic speech seems to be independent from our  
43 ability to understand visual speech. In the typical adult population, performance in  
44 auditory/verbal and visual speech comprehension tasks are uncorrelated (Conrad, 1977;  
45 Jeffers & Barley, 1980; Mohammed, Campbell, Macsweeney, Barry, & Coleman, 2006;  
46 Summerfield, 1991, 1992). In contrast to this behavioural dissociation, neuroimaging and  
47 neuroanatomical studies have suggested the convergence of acoustic and visual speech  
48 information in some brain regions (Calvert et al., 1997; Campbell, 2007; Ralph, Jefferies,  
49 Patterson, & Rogers, 2017; Simanova, Hagoort, Oostenveld, & Van Gerven, 2012). Prevalent  
50 models postulate a fronto-temporal network mediating acoustic speech representations,  
51 comprising a word-meaning pathway from auditory cortex to inferior frontal areas, and an  
52 articulatory pathway that extends from auditory to motor regions (Giordano et al., 2017; Giraud  
53 & Poeppel, 2012; Gross et al., 2013; Hickok, 2012; Huth, de Heer, Griffiths, Theunissen, &  
54 Gallant, 2016). Specifically, a number of anterior-temporal and frontal regions have been  
55 implied in implementing a-modal semantic representations (MacSweeney, Capek, Campbell,  
56 & Woll, 2008; Ralph, et al., 2017; Simanova, et al., 2012) and in enhancing speech perception  
57 in adverse environments, based on the combination of acoustic and visual signals (Giordano,  
58 et al., 2017).

59 Yet, when it comes to representing visual speech signals themselves, our understanding  
60 becomes much less clear. That is, we know relatively little about which brain regions mediate  
61 speech reading (or lip reading; terms used interchangeably). Previous studies have shown  
62 that visual speech activates ventral and dorsal visual pathways and bilateral fronto-temporal  
63 circuits (Bernstein & Liebenthal, 2014; Calvert, et al., 1997; Campbell, 2007; Capek, et al.,  
64 2008). Some studies have explicitly suggested that auditory regions are also involved in  
65 speech reading (Calvert, et al., 1997; Calvert & Campbell, 2003; Capek, et al., 2008; Lee &  
66 Noppeney, 2011; Pekkola et al., 2005). While these findings can be seen to suggest that  
67 largely the same brain regions represent acoustic and visual speech, neuroimaging studies  
68 have left the nature and the functional specificity of these visual speech representations

69 unclear (Bernstein & Liebenthal, 2014; Crosse, et al., 2015; Ozker, Yoshor, & Beauchamp,  
70 2018). This is in part because most studies focused on mapping activations rather than  
71 specific semantic or lexical speech content. Indeed, alternative accounts have been proposed,  
72 which hold that visual and auditory speech representations are largely distinct (Bernstein &  
73 Liebenthal, 2014; for spoken vs sign language, Evans, Price, Diedrichsen, Gutierrez-Sigut, &  
74 MacSweeney, 2019).

75 When investigating how speech is encoded in the brain, it is important to distinguish purely  
76 stimulus driven neural activity (e.g. classic ‘activation’) from activity specifically representing a  
77 stimulus while also mediating the participant’s percept, or behavioural choice, on an individual  
78 trial (Bouton et al., 2018; Grootswagers, Cichy, & Carlson, 2018; Keitel, Gross, & Kayser, 2018;  
79 Panzeri, Harvey, Piasini, Latham, & Fellin, 2017; Tsunada, Liu, Gold, & Cohen, 2016). Indeed,  
80 recent studies have suggested that those cerebral representations representing the physical  
81 speech may be distinct from those reflecting the actually perceived meaning. For example,  
82 syllable identity can be decoded from temporal, occipital and frontal areas, but only focal  
83 activity in the IFG and pSTG mediates perceptual categorisation (Bouton, et al., 2018).  
84 Similarly, the encoding of the acoustic speech envelope is seen widespread in the brain, but  
85 correct word comprehension correlates only with focal activity in temporal and motor regions  
86 (Keitel, et al., 2018). In general, activity in lower sensory pathways seems to correlate more  
87 with the actual physical stimulus, while activity in specific higher-tier regions correlates with the  
88 subjective percept (Crochet, Lee, & Petersen, 2018; Romo, Lemus, & de Lafuente, 2012).  
89 However, this differentiation poses a challenge for data analysis, and studies on sensory  
90 perception are only beginning to address this systematically (Grootswagers, et al., 2018;  
91 Panzeri, et al., 2017; Ritchie, Tovar, & Carlson, 2015).

92 We here capitalise on this functional differentiation of cerebral speech representations linked  
93 to the physical stimulus or the actual percept, to identify comprehension-relevant encoding of  
94 auditory and visual word identity in the human brain. That is, we ask where and to what degree  
95 comprehension-relevant representations of auditory and visual speech overlap. To this end,  
96 we exploit a paradigm in which participants performed a comprehension task based on  
97 individual sentences that were presented either acoustically or visually (lip reading), while brain  
98 activity was recorded using MEG (Keitel, et al., 2018). We then extract single trial word  
99 representations and, apply multivariate classification analysis geared to quantify i) where brain  
100 activity correctly encodes the actual stimulus, and ii) where the strength of the cerebral  
101 representation of word identity is predictive of the participant’s comprehension.

## 102 Results

### 103 Behavioural performance

104 On each trial participants viewed or listened to visual or acoustically presented sentences  
105 (presented in blocks), and performed a comprehension task (4-alternative forced choice) on a  
106 specific target word. Acoustic sentences were presented mixed with background noise, to  
107 equalise performance between visual and auditory trials. On average, participants perceived  
108 the correct target word in approximately 70% of trials across auditory and visual conditions  
109 (chance level was 25%). The behavioural performance did not differ significantly between  
110 these conditions ( $M_{\text{auditory}} = 69.7\%$ ,  $SD = 7.1\%$ ,  $M_{\text{visual}} = 71.7\%$ ,  $SD = 20.0\%$ ;  $t(19) = -0.42$ ,  
111  $p = 0.68$ ; **Figure 1**), demonstrating that the addition of acoustic background noise indeed  
112 equalised performance between conditions. Still, the between-subject variability in  
113 performance was larger in the visual condition (between 31.7% and 98.3%), in line with the  
114 notion that lip reading abilities vary extremely across individuals (Bernstein & Liebenenthal, 2014;  
115 Summerfield, 1992; Tye-Murray, Hale, Spehar, Myerson, & Sommers, 2014). An F-test  
116 confirmed that the variance between the auditory and visual condition differed significantly  
117 ( $F(17,17) = 0.13$ ,  $p < .00001$ ). Due to the near ceiling performance (above 95% correct), the  
118 data from three participants in the visual condition had to be excluded from the neuro-  
119 behavioural analysis. Participants also performed the task with auditory and visual stimuli  
120 presented at the same time (audiovisual condition), but as performance in this condition was  
121 near ceiling, we present the corresponding data only in the supplementary material (**Suppl.**  
122 **Figure 1**).

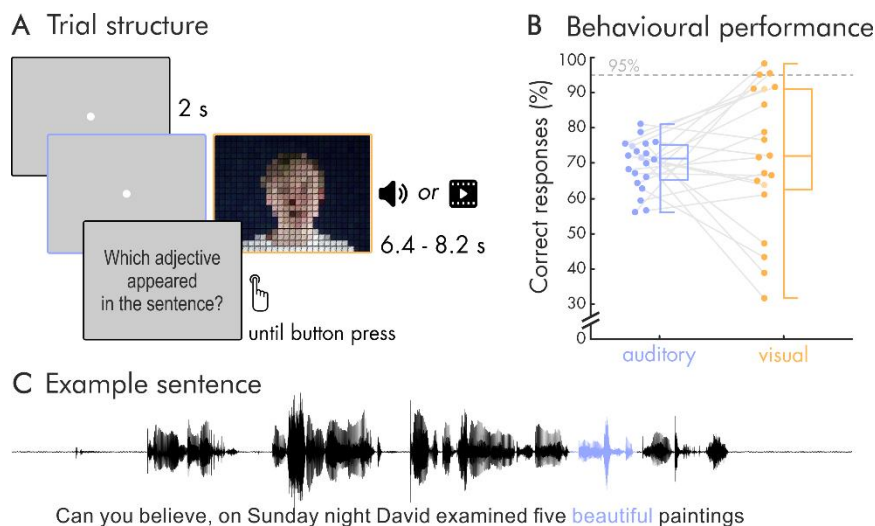

123

124 **Figure 1.** Trial structure and behavioural performance. **A**) Trial structure was identical in the auditory and visual  
125 conditions. Participants listened to sentences while a fixation dot was presented (auditory condition) or watched  
126 videos of a speaker saying sentences (visual condition). The face of the speaker is obscured for this figure only, it  
127 was clear to participants. After each trial, a prompt on the screen asked which adjective (or number) appeared in  
128 the sentence and participants chose one of four alternatives by pressing a corresponding button. **B**) Dots represent  
129 individual participants, boxes denote median and interquartile ranges, whiskers denote minima and maxima (no  
130 outliers present) for all 20 participants. MEG data of two participants (shaded in a lighter colour) were not included  
131 in neural analyses due to excessive artifacts. Subjects exceeding a performance of 95% correct (grey line) were  
132 excluded from the neuro-behavioural analysis (for the visual condition, three participants had a performance above  
133 95% correct). **C**) Example sentence with target adjective marked in blue.

134 *Decoding word identity from MEG source activity*

135 Using multivariate classification, we quantified how well the single-trial word identity could be  
136 correctly predicted from source-localised brain activity. Classification was computed in source  
137 space at the single-subject level and converted to z-scores for group-level analysis.  
138 Importantly, for each trial we computed classification performance within the subset of the four  
139 presented alternative words in each trial, based on which participants performed their  
140 behavioural judgement. We did this to be able to directly link neural representations of word  
141 identity with perception in a later analysis. We first quantified how well brain activity encoded  
142 the word identity regardless of behaviour ('stimulus-classification'; c.f. **Materials and**  
143 **Methods**). The group-level analysis (*t*-test, two-sided, FDR-corrected) revealed significant  
144 stimulus classification performance in both conditions within a widespread network of temporal,  
145 occipital and frontal regions (**Figure 2**).

146 Auditory speech was represented bilaterally in fronto-temporal areas, extending into intra-  
147 parietal regions within the left hemisphere (**Figure 2A**), with classification performance ranging  
148 from 25.3% to 29.2% (with a chance level of 25%). Visual speech was represented bilaterally  
149 in occipital areas, as well as in left parietal and frontal areas (**Figure 2B**), with classification  
150 performance between 25.1% and 34.3%. Interestingly, the regions representing word identity  
151 in visual and auditory conditions overlapped only little (mostly in left intraparietal regions;  
152 **Figure 2C**; overlap in green). This suggests that largely distinct regions represent visual and  
153 acoustic speech, in line with the notion that auditory and visual speech signals are reflected  
154 most strongly within the respective sensory cortices (Hauswald, Keitel, Roesch, & Weisz,  
155 2019; Keitel, et al., 2018). Results for the audiovisual condition essentially mirror these  
156 unimodal findings and exhibit significant stimulus classification in bilateral temporal and  
157 occipital regions (**Suppl. Figure 1B**).



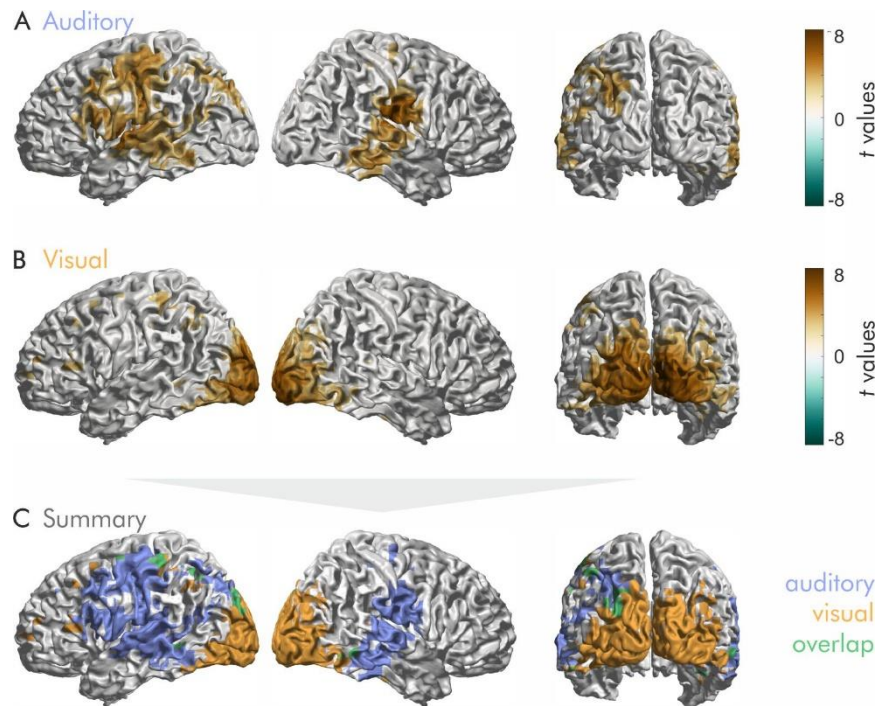

158

159 **Figure 2.** Word classification performance regardless of behavioural performance ('stimulus classification').  
160 Surface projections show areas with significant classification performance at the group level (surface projection of  
161 the  $t$ -statistics,  $p < 0.05$ , two-sided, FDR corrected). Results show strongest classification performance in temporal  
162 regions for the auditory condition (A) and occipital areas for the visual condition (B). Panel (C) overlays the  
163 significant effects from both conditions, with the overlaps shown in green.

### 164 *Cerebral speech representations that are predictive of comprehension*

165 The above analysis leaves it unclear which of the neural representations are perceptually  
166 relevant and shape single-trial word comprehension. To directly address this, we computed  
167 an index of how strongly the evidence for a specific word identity in the neural single-trial word  
168 representations is predictive of the participant's response. That is, we regressed the evidence  
169 in the cerebral classifier for word identity against the participants' behaviour (see **Materials**  
170 **and Methods**). The resulting neuro-behavioural weights (regression  $\beta$ s) were converted  
171 into  $t$ -values for group-level analysis. The results in **Figure 3** (two-sided cluster-based  
172 permutation statistics, corrected at  $p = 0.05$  FWE) reveal largely distinct regions in which  
173 neural representations of word identity are predictive of behaviour. In the auditory condition,  
174 we found a large left-lateralised cluster covering ventral portions of occipital, temporal, and  
175 inferior frontal areas ( $T_{\text{sum}} = 868.32$ ,  $p < .001$ ), and a cluster in the right inferior parietal cortex  
176 ( $T_{\text{sum}} = 157.46$ ,  $p < .001$ ; **Figure 3A**). In the visual condition, we found three dorsal clusters in  
177 the left superior frontal gyrus ( $T_{\text{sum}} = 201.54$ ,  $p < .001$ ), the inferior frontal gyrus ( $T_{\text{sum}} = 379.18$ ,  
178  $p < .001$ ), and premotor cortex ( $T_{\text{sum}} = 23.55$ ,  $p < .001$ ), and one cluster in the right  
179 supramarginal cortex ( $T_{\text{sum}} = 167.93$ ,  $p < .001$ ; **Figure 3B**). MNI coordinates of local maxima  
180 and the corresponding  $\beta$  and  $t$ -values are given in **Table 1**. The corresponding results for  
181 the audiovisual condition are presented in **Suppl. Figure 1C**.

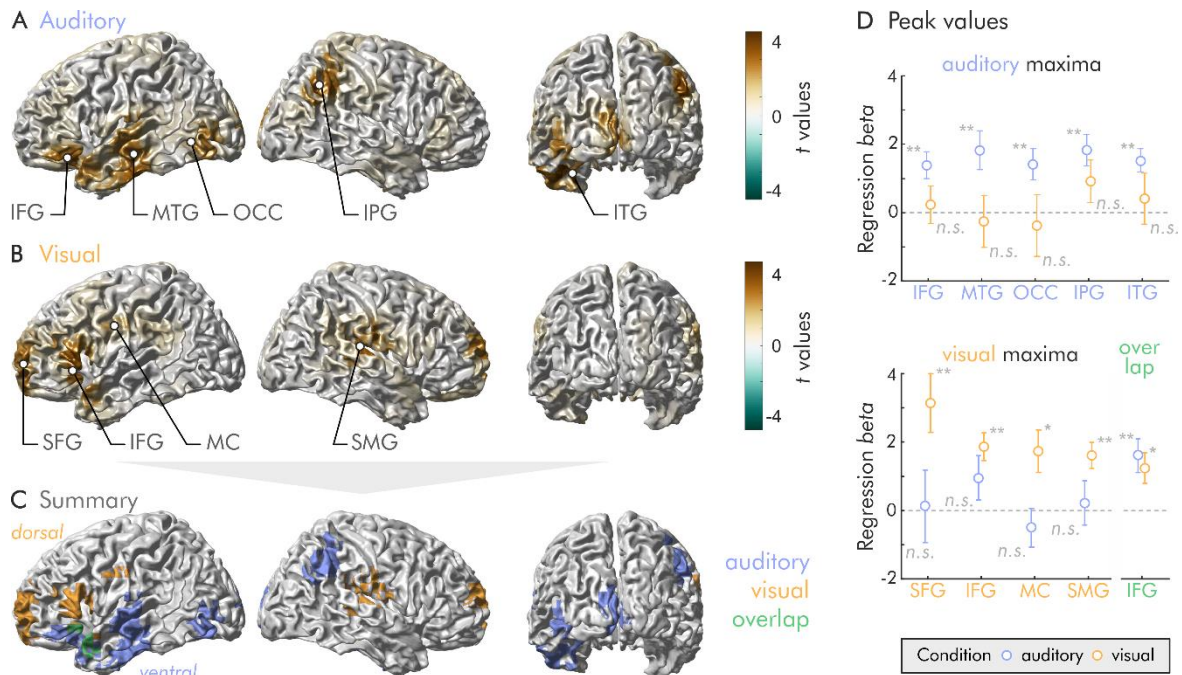

182

183 **Figure 3.** Cortical areas in which neural word representations predict participants' percept. Coloured areas denote  
 184 significant group-level effects (surface projection of the cluster-based permutation statistics, corrected at  $p < 0.05$   
 185 FWE). In the auditory condition (A), we found a large left-lateralised ventral cluster (a global peak in ITG and three  
 186 local maxima marked with dots), as well as a smaller cluster in inferior parietal cortex (peak marked with dot). In the  
 187 visual condition (B), we found three clusters in left frontal and somato-motor cortex, as well as one cluster in right  
 188 supramarginal cortex (all peaks are marked with dots). Panel (C) overlays the significant effects from both  
 189 conditions, with the overlap shown in green. The overlap comprises regions in the left inferior frontal gyrus and  
 190 temporal pole. D) Neuro-behavioural effect (at local and global maxima, and maximum of overlap). Regions that  
 191 predict auditory word perception do not predict visual word perception, and vice versa. Asterisks indicate results of  
 192 statistical t-test against zero (\*\*:  $p < .01$ , \*:  $p < .05$ , n.s.:  $p > .05$ ; all  $p$ -values FDR corrected).  
 193 IFG – inferior frontal gyrus; MTG – middle temporal gyrus; OCC – occipital gyrus; IPG – inferior parietal gyrus; ITG  
 194 – inferior temporal gyrus; SFG – superior frontal gyrus; MC – motor cortex; SMG – supramarginal gyrus.

195 **Table 1.** Global and local maxima of neuro-behavioural analysis in both conditions. Labels are taken from the AAL  
 196 atlas (Tzourio-Mazoyer et al., 2002). For each peak, MNI coordinates, regression  $\beta$  (SEM) and corresponding  $t$ -  
 197 value are presented. Abbreviations as used in Figure 3 are given in parentheses. Global maxima noted in italics.  
 198 For the peak within the significant overlap of auditory and visual conditions, averaged (across both conditions)  $\beta$   
 199 and  $t$ -values are given.

| Atlas label                                               | MNI coordinates | Beta (SEM)  | t-value |
|-----------------------------------------------------------|-----------------|-------------|---------|
| <b>Auditory</b>                                           |                 |             |         |
| Frontal Inf Orb L (IFG)                                   | -33 30 -14      | 1.38 (0.39) | 3.53    |
| Temporal Mid L (MTG)                                      | -64 -26 -14     | 1.82 (0.57) | 3.12    |
| Occipital Mid L, Occipital Inf L,<br>Temporal Mid L (OCC) | -40 -67 -2      | 1.41 (0.45) | 3.16    |
| <i>Parietal Inf R, Angular R (IPG)</i>                    | 51 -60 40       | 1.82 (0.47) | 3.92    |
| <i>Temporal Inf L (ITG)</i>                               | -35 -25 -29     | 1.52 (0.34) | 4.47    |
| <b>Visual</b>                                             |                 |             |         |
| Frontal Sup Medial L (SFG)                                | -9 53 10        | 2.63 (0.76) | 3.69    |
| Frontal Inf Tri L (IFG)                                   | -56 23 -1       | 1.68 (0.41) | 4.71    |
| Postcentral L (MC)                                        | -62 -8 35       | 1.44 (0.54) | 2.80    |
| Rolandic Oper R, Heschl R (SMG)                           | 43 -26 21       | 1.41 (0.33) | 4.18    |
| <b>Overlap</b>                                            |                 |             |         |
| Frontal Inf Orb L, Temporal Pole Sup L                    | -46 18 -15      | 1.44 (0.34) | 2.99    |



200 Collectively, these results highlight that in the left hemisphere, perception-relevant  
201 representations of acoustic speech reside mainly in ventral regions, whereas those for visual  
202 speech are found mostly in dorsal frontal areas (**Figure 3C**). In the right hemisphere, auditory  
203 speech representations in parietal regions and visual speech representations in auditory  
204 (supramarginal) regions are also predictive of perception. In large, these auditory and visual  
205 representations seem distinct, but overlap within higher-order language areas, such as the left  
206 inferior frontal and anterior superior temporal gyri.

207 Given that individual effects were sometimes only significant in one hemisphere, we  
208 performed a direct statistical test on whether these effects are indeed lateralised (c.f. **Materials**  
209 **and Methods**). We only found evidence for a statistically significant lateralisation for the large  
210 ventral cluster in the auditory condition ( $t(17) = 2.88$ ,  $p_{\text{FDR}} = .02$ , corresponding to local maxima  
211 in IFG, MTG, OCC and ITG). In the other clusters, corresponding *betas* in the contralateral  
212 hemisphere were systematically smaller, but did not differ significantly from original effects (all  
213  $p_{\text{FDR}} \geq .15$ ).

214 To substantiate that perception-relevant auditory and visual representations are largely  
215 distinct, we performed two control analyses. First, we tested whether the representations  
216 identified as relevant for visual (auditory) speech are also predictive of perception in the  
217 respective other condition. That is, we directly compared the perceptual-relevance for visual  
218 and auditory speech representations for those significant clusters shown in **Figure 3A,B**. The  
219 result, **Figure 3D**, shows that each region predicts perception only within one modality, with  
220 the exception of the overlap in the left IFG.

221 Second, we implemented a cross-decoding analysis, in which we directly quantified whether  
222 the activity patterns of local speech representations are the same across modalities. At the  
223 whole-brain level, we found no evidence for significant cross-classification (at  $p = 0.05$ , FDR  
224 corrected, **Figure 4A**), although statistically significant cross-classification is in principle  
225 possible from the data, as shown by the audiovisual condition (**Suppl. Figure 1D**).

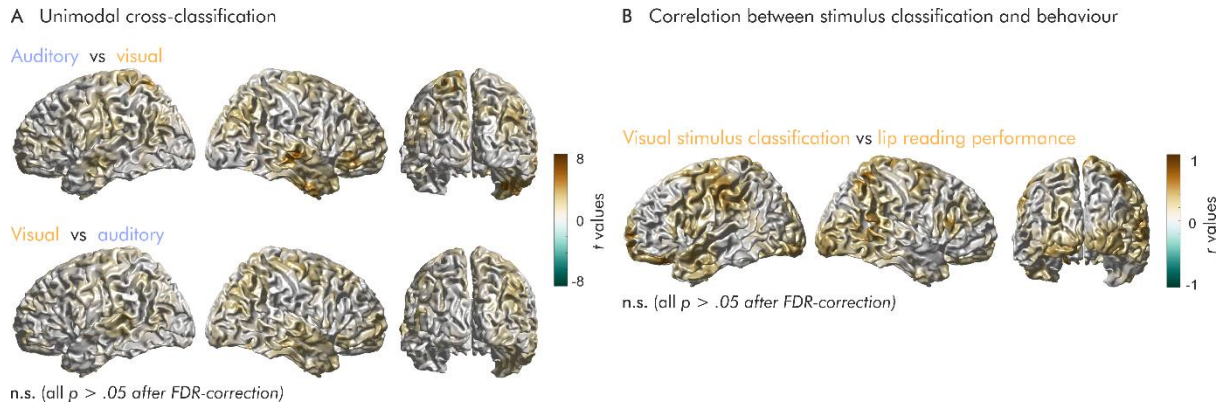

226

227 **Figure 4.** Control analyses. **A)** Cross-classification between auditory and visual conditions. Areas where word  
228 identity in the auditory trial can be predicted based on the word representations obtained from the visual condition  
229 (upper panel), and vice versa (lower panel). Classification performance did not survive correction for multiple  
230 comparison at an alpha-level of 5%, supporting the result that auditory and visual word identities are largely  
231 represented in different networks. Colour scale is adapted from Figure 2, to allow a comparison of results. **B)**  
232 Correlation between visual word classification performance and behavioural lip reading performance. Surface  
233 projection of resulting rho-values. None of the results survived correction for multiple comparisons at an alpha-level  
234 of 5%, supporting the finding that stimulus classification alone does not predict behaviour.

### 235 *Strong sensory representations do not necessarily predict behaviour*

236 The above results suggest that the brain regions in which sensory representations shape  
237 speech comprehension are distinct from those allowing the best prediction of the actual  
238 stimulus. In other words, the accuracy by which local activity reflects the physical stimulus is  
239 not predictive of its' perceptual impact. To test this formally, we performed within-participant  
240 regression analyses between the overall stimulus classification performance and the  
241 perceptual weight of each local representation across all grid points. Group-level statistics of  
242 the participant-specific *beta* values provided no support for a consistent relationship between  
243 these (auditory condition:  $b = 1.44 \pm 1.62$  [M  $\pm$  SEM],  $t(17) = 0.90$ ,  $p_{\text{FDR}} = .58$ ; visual condition:  
244  $b = 1.59 \pm 2.57$  [M  $\pm$  SEM],  $t(14) = 0.56$ ,  $p_{\text{FDR}} = .58$ ).

245 Still, this leaves it unclear whether variations in the strength of neural speech representations  
246 can explain variations in the behavioural performance differences *between* participants. Such  
247 an analysis was feasible only for the visual condition, as participants' performance here reflects  
248 their individual lipreading skills, whereas performance in the auditory condition was  
249 manipulated to yield around 70% correct responses. We correlated the stimulus classification  
250 performance for all grid points with participants' visual performance. Stimulus classification  
251 performance was not significantly correlated with lip reading performance across participants  
252 (all  $p_{\text{FDR}} > .94$ , **Figure 4B**).

253

## 254 Discussion

### 255 *Acoustic and visual speech are represented in largely distinct brain regions*

256 The principal finding of this study is that the cerebral representations of unimodal auditory and  
257 visual speech signals are spatially dissociated and each dominates within distinct brain  
258 regions. This is the case for overall strength of word representations, which are mostly related  
259 to the physical stimuli themselves, and it is also the case for those word representations that  
260 are directly predictive of the individual's single-trial percept. The inability to cross-classify  
261 auditory and visual speech from local brain activity further supports the conclusion that  
262 acoustic and visual speech representations are largely distinct. These results provide an  
263 explanation for the generally observed finding that auditory or verbal skills and visual lip  
264 reading are uncorrelated in normal-hearing adults (Jeffers & Barley, 1980; Mohammed, et al.,  
265 2006; Summerfield, 1992). Indeed, it has been suggested that individual differences in  
266 lipreading represent something other than normal variation in speech perceptual abilities  
267 (Summerfield, 1992). For example, lip reading skills are unrelated to reading abilities in the  
268 typical adult population (Arnold & Köpse, 1996; Mohammed, et al., 2006), although a  
269 relationship is sometimes found in deaf or dyslexic children (Arnold & Köpse, 1996; de Gelder  
270 & Vroomen, 1998; Kyle, Campbell, & MacSweeney, 2016). The only language ability that can  
271 accurately predict speech reading skills in the typical population seems to be guessing  
272 strategies (Lyxell & Ronnberg, 1989; Van Tasell & Hawkins, 1981).

273 We found that perceptually relevant representations of acoustic and visual speech converge  
274 only within small regions in the left temporal pole and inferior frontal cortex. These two regions  
275 coincide with the higher-order part of the ventral speech pathway. Thus, our results confirm  
276 that these regions represent the a-modal and perceived meaning of words, based on a direct  
277 assessment of the cerebral speech representations predictive of single trial comprehension  
278 (Ralph, et al., 2017; Simanova, et al., 2012).

279 Previous imaging studies suggested that silent lipreading engages similar regions of the  
280 auditory cortex as acoustic speech (Calvert, et al., 1997; Calvert & Campbell, 2003; Capek, et  
281 al., 2008; MacSweeney et al., 2000; Paulesu et al., 2003; Pekkola, et al., 2005), implying a  
282 direct route for visual speech into the auditory pathways and an overlap of acoustic and visual  
283 speech representations in these regions (Bernstein & Liebenthal, 2014). Studies comparing  
284 semantic representations of categories from different modalities (e.g. pictures and words) also  
285 found large networks with modality-independent activations (Fairhall & Caramazza, 2013;  
286 Shinkareva, Malave, Mason, Mitchell, & Just, 2011; Simanova, et al., 2012). Yet, most studies  
287 have focused on mapping activation strength rather than the *word identity* of cerebral speech  
288 representations. Hence, it could be that visual speech may activate a large language network  
289 in an unspecific manner, without engaging specific semantic or lexical representations, maybe  
290 as a result of attentional engagement or feed-back (Balk et al., 2013; Ozker, et al., 2018).  
291 Support for this interpretation comes from lip reading studies showing that auditory cortical  
292 areas are equally activated by visual words and pseudo-words (Calvert, et al., 1997; Paulesu,  
293 et al., 2003). While our results suggest that visual speech is largely represented in occipital  
294 and frontal regions, we found that the cerebral encoding of visual speech in right auditory

295 regions (supramarginal and superior temporal gyrus) is also predictive of participants' percept.  
296 We therefore support the notion that auditory temporal regions can also contribute to lip-  
297 reading. Importantly though, these regions differ from the ones that contribute to auditory  
298 speech comprehension.

299 Another specific region mediating lip-reading comprehension was the IFG, which we have  
300 previously also shown to participate in the visual facilitation of auditory speech-in-noise  
301 perception (Giordano, et al., 2017). Behavioural studies have shown that lip-reading drives  
302 the improvement of speech perception in noise (MacLeod & Summerfield, 1987), hence  
303 suggesting that the representations of visual speech in the IFG revealed here are indeed  
304 central for hearing in noisy environments, as suggested previously (Giordano, et al., 2017)..  
305 Interestingly, these regions resemble the left-lateralised dorsal pathway activated in deaf  
306 signers when seeing signed verbs (Emmorey, McCullough, Mehta, Ponto, & Grabowski, 2011).  
307 Still, our study cannot directly address whether these auditory and visual speech  
308 representations are the same as those that mediate the multisensory facilitation of speech  
309 comprehension in adverse environments (Bishop & Miller, 2009; Giordano, et al., 2017). The  
310 analysis of the audiovisual condition suggested that stimulus-related representations can be  
311 found in auditory and visual sensory areas, similar to unimodal conditions. The preliminary  
312 results from a small sample of participants suggest that right precentral and inferior frontal  
313 areas drive speech perception in multisensory conditions, in agreement with our previous work  
314 (Giordano, et al., 2017).

### 315 *Sub-optimally encoding brain areas contribute critically to behaviour*

316 To understand which cerebral representations of sensory information guide behaviour, it is  
317 important to dissociate those that mainly correlate with the indicated percept from those that  
318 encode sensory information and guide behavioural choice (Grootswagers, et al., 2018;  
319 Panzeri, et al., 2017; Pica et al., 2017). Single neuron studies have proposed that only those  
320 neurons encoding the specific stimulus optimally are readout and used to drive behaviour by  
321 downstream areas (Britten, Newsome, Shadlen, Celebrini, & Movshon, 1996; Pitkow, Liu,  
322 Angelaki, DeAngelis, & Pouget, 2015; Purushothaman & Bradley, 2005). However, other  
323 studies suggest that "plain" sensory information, and sensory information predictive of choice  
324 can be decoupled across neurons (Runyan, Piasini, Panzeri, & Harvey, 2017). On a larger  
325 scale, the proportions of neurons correlating with the physical stimulus and those correlating  
326 with the subjective percept are also de-correlated, with perceptually-relevant neurons  
327 dominating within high-level sensory and frontal regions (Leopold & Logothetis, 1999; Romo,  
328 et al., 2012). In general, such a dissociation of sensory and choice-related neural  
329 representations necessarily emerges in any paradigm where performance is below ceiling, as  
330 those regions most predictive of the participants' choice will not be those best representing the  
331 stimulus (de-Wit, Alexander, Ekroll, & Wagemans, 2016; Panzeri, et al., 2017). Theoretically,  
332 these different types of neural representations can be dissected by considering the intersection  
333 of brain activity predictive of stimulus and choice (Panzeri, et al., 2017). In practice, however,  
334 it remains a challenge to elucidate these distinct representations, as stimulus and response  
335 may correlate for multiple reasons, including confounding factors (Panzeri, et al., 2017).

336 We here capitalised on the use of a stimulus-classifier to first pinpoint brain activity carrying  
337 relevant word-level information and to then test where the quality of the single trial word  
338 representation is predictive of participants' comprehension (Cichy, Kriegeskorte, Jozwik, van  
339 den Bosch, & Charest, 2017; Grootswagers, et al., 2018; Ritchie, et al., 2015). This revealed  
340 that brain regions allowing for a sub-optimal readout of the actual stimulus are predictive of the  
341 perceptual outcome, whereas those areas allowing the best read-out not necessarily predict  
342 behaviour, a dissociation emerging in several recent studies on the neural basis underlying  
343 perception (Bouton, et al., 2018; Grootswagers, et al., 2018; Hasson, Skipper, Nusbaum, &  
344 Small, 2007; Keitel, et al., 2018).

345 One factor that may shape the behavioural relevance of local sensory representations is the  
346 specific task imposed (Hickok & Poeppel, 2007). In studies showing the perceptual relevance  
347 of optimally encoding neurons, the tasks were mostly dependent on low-level features (Pitkow,  
348 et al., 2015; Tsunada, et al., 2016), while studies pointing to a behavioural relevance of high  
349 level regions were relying on high-level information such as semantics or visual object  
350 categories (Grootswagers, et al., 2018; Keitel, et al., 2018). One prediction from our results is  
351 therefore that if the nature of the task was changed from speech comprehension to an acoustic  
352 task, the perceptual relevance of word representations would shift from left anterior regions to  
353 strongly word encoding regions in the temporal and supramarginal regions. Similarly, if the  
354 task would concern detecting basic kinematic features of the visual lip trajectory, activity within  
355 early visual cortices tracking the stimulus dynamics should be more predictive of behavioural  
356 performance (Di Russo et al., 2007; Keitel et al., 2019; Keitel, Thut, & Gross, 2017).

### 357 *Conclusion*

358 Overall, our results suggest that cerebral representations of acoustic and visual speech might  
359 be more modality-specific than often assumed, and provide a neural explanation for why  
360 acoustic speech comprehension is a poor predictor of lip-reading skills. Our results also  
361 suggest that those cerebral speech representations that directly drive comprehension are  
362 largely distinct from those best representing the physical stimulus, strengthening the notion  
363 that neuroimaging studies need to more specifically quantify the cerebral mechanisms driving  
364 single trial behaviour.

365



## 366 Materials & Methods

367 Part of the dataset analysed in the present study has been used in a previous publication  
368 (Keitel, et al., 2018). The data analysis performed here is entirely different from the previous  
369 work and includes unpublished data.

### 370 *Participants and data acquisition*

371 Twenty healthy, native volunteers participated in this study (9 female, age  $23.6 \pm 5.8$  y [ $M \pm$   
372  $SD$ ]). The sample size was set based on previous recommendations (Bieniek, Bennett,  
373 Sekuler, & Rousselet, 2016; Poldrack et al., 2017; Simmons, Nelson, & Simonsohn, 2011).  
374 MEG data of two participants had to be excluded due to excessive artefacts. Analysis of MEG  
375 data therefore included 18 participants (7 female), whereas the analysis of behavioural data  
376 included 20 participants. All participants were right-handed (Edinburgh Handedness Inventory;  
377 Oldfield, 1971), had normal hearing (Quick Hearing Check; Koike, Hurst, & Wetmore, 1994),  
378 and normal or corrected-to-normal vision. Participants had no self-reported history of  
379 neurological or language disorders. All participants provided written informed consent prior to  
380 testing and received monetary compensation of £10/h. The experiment was approved by the  
381 ethics committee of the College of Science and Engineering, University of Glasgow (approval  
382 number 300140078), and conducted in compliance with the Declaration of Helsinki.

383 MEG was recorded with a 248-magnetometers, whole-head MEG system (MAGNES 3600  
384 WH, 4-D Neuroimaging) at a sampling rate of 1 KHz. Head positions were measured at the  
385 beginning and end of each run, using five coils placed on the participants' head. Coil positions  
386 were co-digitised with the head-shape (FASTRAK®, Polhemus Inc., VT, USA). Participants  
387 sat upright and fixated a fixation point projected centrally on a screen. Visual stimuli were  
388 displayed with a DLP projector at 25 frames/second, a resolution of  $1280 \times 720$  pixels, and  
389 covered a visual field of  $25 \times 19$  degrees. Sounds were transmitted binaurally through plastic  
390 earpieces and 370-cm long plastic tubes connected to a sound pressure transducer and were  
391 presented stereophonically at a sampling rate of 22,050 Hz. Stimulus presentation was  
392 controlled with Psychophysics toolbox (Brainard, 1997) for MATLAB (The MathWorks, Inc.) on  
393 a Linux PC.

### 394 *Stimuli*

395 Data of two conditions across two experimental sessions were used for the current analysis:  
396 an auditory only (A) and visual only (V) condition. Participants also completed a third condition  
397 in which the same stimulus material was presented audiovisually. This condition could not be  
398 used for the present analysis as participants performed near ceiling level in the behavioural  
399 task (correct trials:  $M = 96.5\%$ ,  $SD = 3.4\%$ ; see **suppl. Figure 1A** for results). The stimulus  
400 material consisted of two equivalent sets of 90 sentences (180 in total) that were spoken by a  
401 trained, male, native British actor. Sentences were recorded with a high-performance  
402 camcorder (Sony PMW-EX1) and external microphone. The speaker was instructed to speak  
403 clearly and naturally. Each sentence had the same linguistic structure (Keitel, et al., 2018).  
404 An example is: “*Did you notice* (filler phase), *on Sunday night* (time phrase) *Graham* (name)

405 *offered* (verb) *ten* (number) *fantastic* (adjective) *books* (noun)". In total, 18 possible names,  
406 verbs, numbers, adjectives, and nouns were each repeated ten times. Sentence elements  
407 were re-combined within a set of 90 sentences. As a result, sentences made sense, but no  
408 element could be semantically predicted from the previous material. To measure  
409 comprehension performance, a target word was selected that was either the adjective in one  
410 set of sentences ('fantastic' in the above example) or a three-syllable number in the other set  
411 (for example, 'thirty-two'). The duration of sentences ranged from 4.2 s to 6.5 s ( $5.4 \pm 0.4$  s [ $M$   
412  $\pm SD$ ]). Noise/video onset and offset was approximately 1 second before and after the speech,  
413 resulting in stimulus lengths of 6.4 s to 8.2 s (**Figure 1**).

414 The acoustic speech was embedded in noise to match performance between auditory and  
415 visual conditions. The noise consisted of ecologically valid, environmental sounds (traffic, car  
416 horns, talking), combined into a uniform mixture of 50 different background noises. The  
417 individual noise level for each participant was determined with a one-up-three-down staircase  
418 procedure that was designed to yield a performance of 70% correct. For the staircase  
419 procedure, only the 18 possible target words (i.e. adjectives and numbers) were used instead  
420 of whole sentences. Participants were presented with a single target word embedded in noise  
421 and had to choose between two alternatives. The average signal-to-noise ratio across  
422 participants was approximately -6 dB.

### 423 *Experimental Design*

424 The 180 sentences were presented in two conditions (A, V), each consisting of four blocks with  
425 45 sentences each. In each block, participants either reported the comprehended adjective or  
426 number, resulting in two 'adjective blocks' and two 'number blocks'. The order of sentences  
427 and blocks was randomised for each participant. The first trial of each block was a 'dummy'  
428 trial that was discarded for subsequent analysis; this trial was repeated at the end of the block.

429 During the presentation of the sentence, participants fixated either a dot (auditory condition) or  
430 a small cross on the speaker's mouth (visual condition; see **Figure 1** for depiction of trial  
431 structure). After each sentence, participants were presented with four target words (either  
432 adjectives or written numbers) on the screen and had to indicate which one they perceived by  
433 pressing one of four buttons on a button box. After 2 seconds, the next trial started  
434 automatically. Each block lasted approximately 10 minutes. The two separate sessions were  
435 completed within one week.

### 436 *MEG pre-processing*

437 Pre-processing of MEG data was carried out in MATLAB (The MathWorks, Inc.) using the  
438 Fieldtrip toolbox (Oostenveld, Fries, Maris, & Schoffelen, 2011). All experimental blocks were  
439 pre-processed separately. Single trials were extracted from continuous data starting 2 sec  
440 before sound/video onset and until 10 sec after onset. MEG data were denoised using a  
441 reference signal. Known faulty channels ( $N = 7$ ) were removed before further pre-processing.  
442 Trials with SQUID jumps (on average 3.86% of trials) were detected and removed using  
443 Fieldtrip procedures with a cutoff z-value of 30. Before further artifact rejection, data were

444 filtered between 0.2 and 150 Hz (fourth order Butterworth filters, forward and reverse) and  
445 down-sampled to 300 Hz. Data were visually inspected to find noisy channels ( $4.95 \pm 5.74$  on  
446 average across blocks and participants) and trials ( $0.60 \pm 1.24$  on average across blocks and  
447 participants). There was no indication for a statistical difference between the number of  
448 rejected channels or trials between conditions ( $p > .48$  for channels,  $p > .40$  for trials). Finally,  
449 heart and eye movement artifacts were removed by performing an independent component  
450 analysis with 30 principal components (2.5 components removed on average). Data were  
451 further down-sampled to 150 Hz and bandpass-filtered between 0.8 and 30 Hz (fourth order  
452 Butterworth filters, forward and reverse).

### 453 *Source reconstruction*

454 Source reconstruction was performed using Fieldtrip, SPM8, and the Freesurfer toolbox. We  
455 acquired T1-weighted structural magnetic resonance images (MRIs) for each participant.  
456 These were co-registered to the MEG coordinate system using a semi-automatic procedure  
457 (Gross, et al., 2013; Keitel, Ince, Gross, & Kayser, 2017). MRIs were then segmented and  
458 linearly normalised to a template brain (MNI space). A forward solution was computed using  
459 a single-shell model (Nolte, 2003). We projected sensor-level timeseries into source space  
460 using a frequency-specific linear constraint minimum variance (LCMV) beamformer (Van  
461 Veen, van Drongelen, Yuchtman, & Suzuki, 1997) with a regularisation parameter of 7% and  
462 optimal dipole orientation (singular value decomposition method). Covariance matrices for  
463 source were based on the whole length of trials to make use of the longer signal (Brookes et  
464 al., 2008). Grid points had a spacing of 6 mm, resulting in 12,337 points covering the whole  
465 brain. For subsequent analyses, we selected grid points that corresponded to cortical regions  
466 only (parcellated using the AAL atlas; Tzourio-Mazoyer, et al., 2002). This resulted in 5,131  
467 grid points in total.

468 Neural timeseries were spatially smoothed (Gross, et al., 2013) and normalised in source  
469 space. For this, the bandpass-filtered timeseries for the whole trial (i.e. the whole sentence)  
470 were projected into source space and smoothed using SPM8 routines with a Full-Width Half  
471 Max value of 3. The timeseries for each cortical grid point and trial was then normalised by  
472 computing the z-score.

### 473 *Decoding analysis*

474 We used multi-variate single trial classification to localise cerebral representations of the target  
475 word in source activity (Grootswagers, Wardle, & Carlson, 2017; Guggenmos, Sterzer, &  
476 Cichy, 2018). Each target word was presented in ten different trials. We extracted the 500 ms  
477 of activity following the onset of each target word and re-binned the source activity at 20 ms  
478 resolution. Classification was performed on spatial searchlights of 1.5 cm radius. We initially  
479 tested a number of different classifiers, including linear-discriminant and diagonal-linear  
480 classifiers, and then selected a correlation-based nearest-neighbour classifier as this  
481 performed slightly better than the others. This (leave-one-trial-out) classifier computed, for a  
482 given trial, the Pearson correlation of the spatio-temporal searchlight activity in this test-trial  
483 with the activities for the same words in all nine other trials (within-target distances), and with

484 the activities of the ten repeats of the three other words offered as alternative words on this  
485 test trial to the participant (between-word distances). That is, each trial was classified within  
486 the sub-set of words that was available to the participant as potential behavioural choices. We  
487 then averaged correlations within the four candidate words and decoded the target trial as the  
488 word identity with the strongest average correlation (that is, smallest classifier distance). This  
489 classification measure is comparable to previous studies probing how well speech can be  
490 discriminated based on patterns of dynamic brain activity (Luo & Poeppel, 2007; Rimmele,  
491 Zion Golumbic, Schroger, & Poeppel, 2015).

492 To quantify the degree to which the evidence of local speech representations in favour of a  
493 specific word identity is predictive of comprehension, we extracted an index of how well the  
494 classifier separated the correct word identity from the three alternatives (Cichy, et al., 2017;  
495 Grootswagers, et al., 2018; Ritchie, et al., 2015). This representational distance was defined  
496 as the average correlation with trials of the same (correct) word identity and the mean of the  
497 correlation with the three alternatives. If a local cerebral representation allows a clear and  
498 robust classification of a specific word identity, this representational distance would be large,  
499 while if a representation allows only for poor classification, or mis-classifies a trial, this distance  
500 will be small or negative. For cross-condition classification (**Figure 4A**), we classified the  
501 single trial activity from the auditory (visual) condition against all trials with the same word  
502 alternatives from the other condition, or from the audiovisual condition.

### 503 *Quantifying the behavioural relevance of speech representations*

504 To determine the degree to which local speech representations are predictive of the individual  
505 percept, that is the participant's choice on each trial, we quantified the statistical relation  
506 between subjects performance (accuracy) and the single trial representational distances  
507 (Cichy, et al., 2017; Grootswagers, et al., 2018; Panzeri, et al., 2017; Pica, et al., 2017; Ritchie,  
508 et al., 2015). This analysis was based on a regularised logistic regression (Parra, Spence,  
509 Gerson, & Sajda, 2005), which was computed across all trials per participant. To avoid biasing,  
510 the regression model was computed across randomly selected subsets of trials with equal  
511 numbers of correct and wrong responses, averaging betas across 50 randomly selected trials.  
512 The resulting *beta* values were then entered into a group-level analysis.

### 513 *Statistical analyses*

514 To test the overall stimulus classification performance, we transformed the performance per  
515 grid point into z-values relative to a surrogate distribution obtained from 2000 within-subject  
516 permutations trial labels (i.e. mean and standard deviation of this normally distributed variable  
517 were used for the z-transformation). These z-values were tested against zero, using a two-  
518 sided, dependent *t*-test. Resulting p-values were corrected for multiple comparisons by  
519 controlling the false discovery rate (FDR) at  $p \leq 0.05$ , using the Benjamini-Hochberg procedure  
520 (Benjamini & Hochberg, 1995).

521 For the neuro-behavioural analyses, the regression *betas* obtained from the logistic regression  
522 were transformed into group-level *t*-values. These were compared with a surrogate distribution

523 of  $t$ -values obtained from 1000 within-subject permutations using shuffled trial labels. Results  
524 of the two-sided, dependent  $t$  test were corrected for multiple comparisons with cluster-based  
525 permutations (Maris & Oostenveld, 2007), corrected at  $p = 0.05$  family-wise error (FWE).  
526 Significant clusters were identified based on a first-level significance two-tailed critical  $t$ -value  
527 of  $t = 2.1$  for the 18 participants in the auditory condition and  $t = 2.2$  for 15 participants in the  
528 visual condition. Clusters were selected based on a minimal cluster size of 10. We report the  
529 summed  $t$ -values ( $T_{\text{sum}}$ ) as measure of effect size.

530 Resulting clusters of the neuro-behavioural analysis were tested for lateralisation (Liegeois et  
531 al., 2002). For this, we extracted the participant-specific regression  $\beta$ s for each cluster and  
532 for the corresponding contralateral grid points.  $\beta$ s were averaged within each cluster and  
533 the between-hemispheric difference was computed using a group-level, two-sided  $t$ -test.  
534 Resulting  $p$ -values were corrected for multiple comparisons by controlling the FDR at  $p \leq 0.05$   
535 (Benjamini & Hochberg, 1995). We only use the term “lateralised” if the between-hemispheric  
536 difference is statistically significant.



## 537 Supplementary Figure

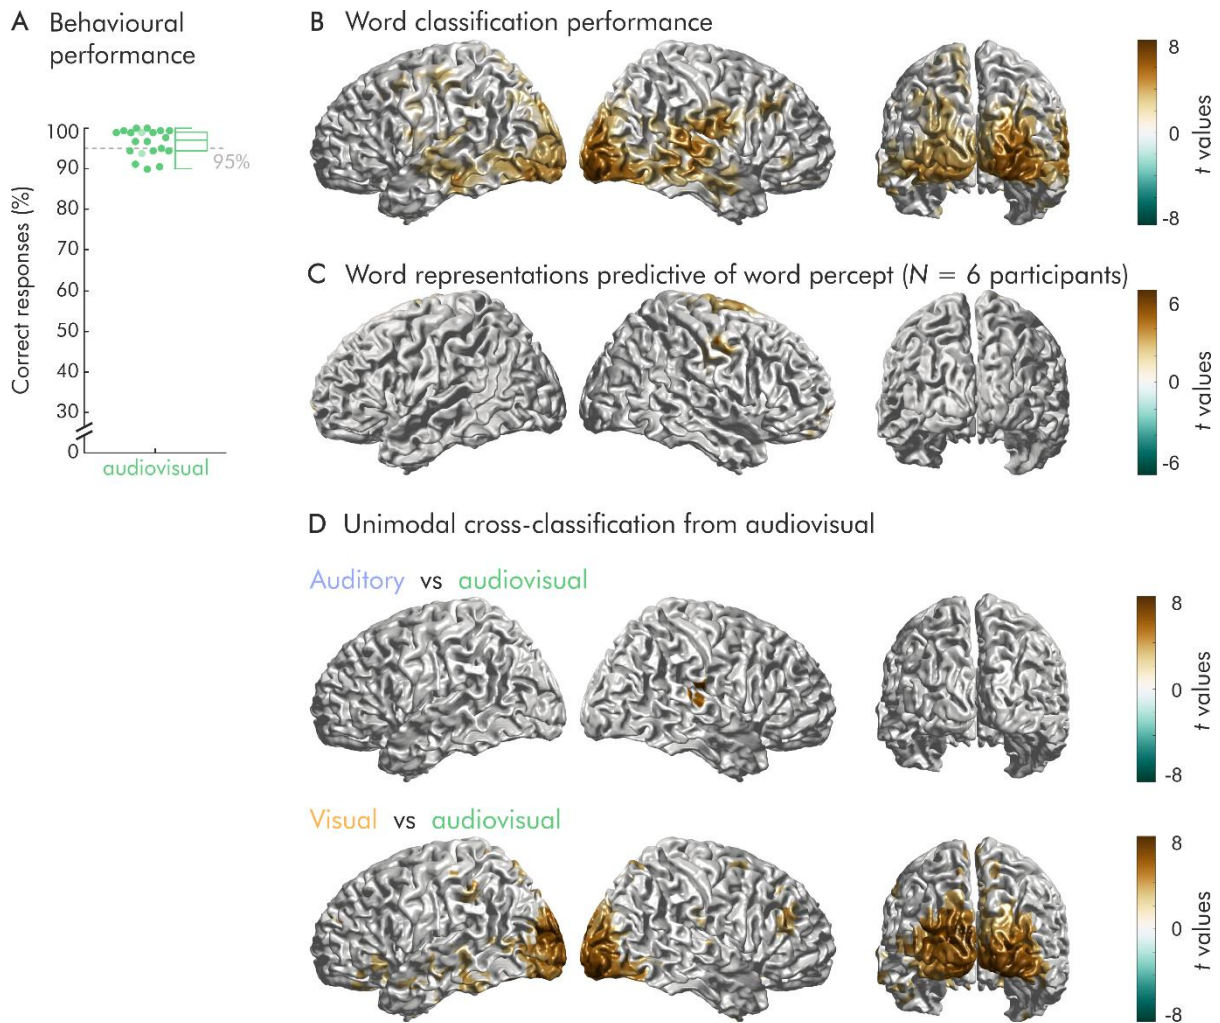

538

539 **Suppl. Figure 1.** Results of the audiovisual condition. **A)** Behavioural performance of 20 participants. Scaling of  
540 the figure is identical to the auditory and visual results for better comparability. Dots represent individual  
541 participants, boxes denote median and interquartile ranges, whiskers denote minimum and maximum (no outliers  
542 present). MEG data of two participants (shaded in a lighter colour) were not included in neural analyses due to  
543 excessive artifacts. Subjects exceeding a performance of 95% correct (grey line) were excluded from the neuro-  
544 behavioural analysis (for the audiovisual condition, twelve participants had a performance above 95% correct). **B)**  
545 Word classification performance in the audiovisual condition. Surface projections show areas with significant  
546 classification performance at the group level (surface projection of the  $t$ -statistics,  $p < 0.05$ , two-sided, FDR  
547 corrected). Results show strongest classification performance in right auditory and bilateral visual sensory areas,  
548 and a classification performance ranging from 25.03% to 33.3% (with a chance level of 25%). **C)** Cortical areas in  
549 which neural word representations predict participants' audiovisual percept. Coloured areas denote significant  
550 group-level effects (surface projection of the cluster-based permutation statistics, corrected at  $p=0.05$  FWE). Three  
551 positive right-lateralised clusters emerged: two in fronto-central regions (superior cluster:  $T_{\text{sum}} = 260.13$ ,  $p < .001$ ;  
552 inferior cluster:  $T_{\text{sum}} = 59.15$ ,  $p < .001$ ), and one in the orbito-frontal region ( $T_{\text{sum}} = 63.42$ ,  $p < .001$ ). **D)** Areas  
553 where word identity in the auditory (upper panel) or visual (lower panel) conditions can be predicted significantly  
554 based on word representations obtained from the audiovisual condition. Auditory word identities can be significantly  
555 classified from audiovisual word representations in a small region in right temporal and supramarginal gyrus. Visual  
556 word identities can be classified from audiovisual word presentations mainly in bilateral occipital cortex.

557

## 558 References

- 559 Arnold, P., & Köpsel, A. (1996). Lipreading, reading and memory of hearing and hearing-  
560 impaired children. *Scandinavian Audiology*, 25(1), 13-20.
- 561 Balk, M. H., Kari, H., Kauramäki, J., Ahveninen, J., Sams, M., Autti, T., & Jääskeläinen, I. P.  
562 (2013). Silent lipreading and covert speech production suppress processing of non-  
563 linguistic sounds in auditory cortex. *Open journal of neuroscience*, 3.
- 564 Benjamini, Y., & Hochberg, Y. (1995). Controlling the False Discovery Rate - a Practical and  
565 Powerful Approach to Multiple Testing. *Journal of the Royal Statistical Society Series*  
566 *B-Methodological*, 57(1), 289-300.
- 567 Bernstein, L. E., & Liebenthal, E. (2014). Neural pathways for visual speech perception.  
568 *Frontiers in Neuroscience*, 8. doi: 10.3389/Fnins.2014.00386
- 569 Bieniek, M. M., Bennett, P. J., Sekuler, A. B., & Rousselet, G. A. (2016). A robust and  
570 representative lower bound on object processing speed in humans. *European Journal*  
571 *of Neuroscience*, 44(2), 1804-1814.
- 572 Bishop, C. W., & Miller, L. M. (2009). A multisensory cortical network for understanding speech  
573 in noise. *Journal of cognitive neuroscience*, 21(9), 1790-1804.
- 574 Bouton, S., Chambon, V., Tyrand, R., Guggisberg, A. G., Seeck, M., Karkar, S., . . . Giraud, A.  
575 L. (2018). Focal versus distributed temporal cortex activity for speech sound category  
576 assignment. *Proc Natl Acad Sci U S A*. doi: 10.1073/pnas.1714279115
- 577 Brainard, D. H. (1997). The Psychophysics Toolbox. *Spat Vis*, 10(4), 433-436.
- 578 Britten, K. H., Newsome, W. T., Shadlen, M. N., Celebrini, S., & Movshon, J. A. (1996). A  
579 relationship between behavioral choice and the visual responses of neurons in  
580 macaque MT. *Visual neuroscience*, 13(1), 87-100.
- 581 Brookes, M. J., Vrba, J., Robinson, S. E., Stevenson, C. M., Peters, A. M., Barnes, G. R., . . .  
582 Morris, P. G. (2008). Optimising experimental design for MEG beamformer imaging.  
583 *Neuroimage*, 39(4), 1788-1802.
- 584 Calvert, G. A., Bullmore, E. T., Brammer, M. J., Campbell, R., Williams, S. C., McGuire, P. K.,  
585 . . . David, A. S. (1997). Activation of auditory cortex during silent lipreading. *science*,  
586 276(5312), 593-596.
- 587 Calvert, G. A., & Campbell, R. (2003). Reading speech from still and moving faces: the neural  
588 substrates of visible speech. *Journal of cognitive neuroscience*, 15(1), 57-70.
- 589 Campbell, R. (2007). The processing of audio-visual speech: empirical and neural bases.  
590 *Philosophical Transactions of the Royal Society B: Biological Sciences*, 363(1493),  
591 1001-1010.
- 592 Capek, C. M., MacSweeney, M., Woll, B., Waters, D., McGuire, P. K., David, A. S., . . .  
593 Campbell, R. (2008). Cortical circuits for silent speechreading in deaf and hearing  
594 people. *Neuropsychologia*, 46(5), 1233-1241. doi:  
595 10.1016/j.neuropsychologia.2007.11.026
- 596 Cichy, R. M., Kriegeskorte, N., Jozwik, K. M., van den Bosch, J. J. F., & Charest, I. (2017).  
597 Neural dynamics of real-world object vision that guide behaviour. *bioRxiv*, 147298. doi:  
598 10.1101/147298
- 599 Conrad, R. (1977). Lip-reading by deaf and hearing children. *British Journal of Educational*  
600 *Psychology*, 47(1), 60-65.
- 601 Crochet, S., Lee, S.-H., & Petersen, C. C. (2018). Neural Circuits for Goal-Directed  
602 Sensorimotor Transformations. *Trends in neurosciences*.
- 603 Crosse, M. J., ElShafei, H. A., Foxe, J. J., & Lalor, E. C. (2015). *Investigating the temporal*  
604 *dynamics of auditory cortical activation to silent lipreading*. Paper presented at the 2015  
605 7th International IEEE/EMBS Conference on Neural Engineering (NER).
- 606 de-Wit, L., Alexander, D., Ekroll, V., & Wagemans, J. (2016). Is neuroimaging measuring  
607 information in the brain? *Psychonomic bulletin & review*, 23(5), 1415-1428.
- 608 de Gelder, B., & Vroomen, J. (1998). Impaired speech perception in poor readers: Evidence  
609 from hearing and speech reading. *Brain and Language*, 64(3), 269-281.

- 610 Di Russo, F., Pitzalis, S., Aprile, T., Spitoni, G., Patria, F., Stella, A., . . . Hillyard, S. A. (2007).  
611 Spatiotemporal analysis of the cortical sources of the steady-state visual evoked  
612 potential. *Human brain mapping*, 28(4), 323-334.
- 613 Emmorey, K., McCullough, S., Mehta, S., Ponto, L. L., & Grabowski, T. J. (2011). Sign  
614 language and pantomime production differentially engage frontal and parietal cortices.  
615 *Language and cognitive processes*, 26(7), 878-901.
- 616 Evans, S., Price, C. J., Diedrichsen, J., Gutierrez-Sigut, E., & MacSweeney, M. (2019).  
617 Evidence for shared conceptual representations for sign and speech. *bioRxiv*, 623645.
- 618 Fairhall, S. L., & Caramazza, A. (2013). Brain regions that represent amodal conceptual  
619 knowledge. *Journal of Neuroscience*, 33(25), 10552-10558.
- 620 Giordano, B. L., Ince, R. A. A., Gross, J., Schyns, P. G., Panzeri, S., & Kayser, C. (2017).  
621 Contributions of local speech encoding and functional connectivity to audio-visual  
622 speech perception. *Elife*, 6. doi: 10.7554/eLife.24763
- 623 Giraud, A. L., & Poeppel, D. (2012). Cortical oscillations and speech processing: emerging  
624 computational principles and operations. *Nat Neurosci*, 15(4), 511-517. doi:  
625 10.1038/nn.3063
- 626 Grootswagers, T., Cichy, R. M., & Carlson, T. A. (2018). Finding decodable information that is  
627 read out in behaviour. *bioRxiv*, 248583. doi: 10.1101/248583
- 628 Grootswagers, T., Wardle, S. G., & Carlson, T. A. (2017). Decoding dynamic brain patterns  
629 from evoked responses: A tutorial on multivariate pattern analysis applied to time series  
630 neuroimaging data. *Journal of cognitive neuroscience*, 29(4), 677-697.
- 631 Gross, J., Hoogenboom, N., Thut, G., Schyns, P., Panzeri, S., Belin, P., & Garrod, S. (2013).  
632 Speech rhythms and multiplexed oscillatory sensory coding in the human brain. *PLoS*  
633 *Biol*, 11(12), e1001752. doi: 10.1371/journal.pbio.1001752
- 634 Guggenmos, M., Sterzer, P., & Cichy, R. M. (2018). Multivariate pattern analysis for MEG: a  
635 comparison of dissimilarity measures. *Neuroimage*, 173, 434-447.
- 636 Hall, D. A., Fussell, C., & Summerfield, A. Q. (2005). Reading fluent speech from talking faces:  
637 typical brain networks and individual differences. *Journal of cognitive neuroscience*,  
638 17(6), 939-953.
- 639 Hasson, U., Skipper, J. I., Nusbaum, H. C., & Small, S. L. (2007). Abstract coding of  
640 audiovisual speech: beyond sensory representation. *Neuron*, 56(6), 1116-1126.
- 641 Hauswald, A., Keitel, A., Roesch, S., & Weisz, N. (2019). Degraded auditory and visual speech  
642 affects theta synchronization and alpha power differently. *bioRxiv*, 615302. doi:  
643 10.1101/615302
- 644 Hickok, G. (2012). The cortical organization of speech processing: Feedback control and  
645 predictive coding the context of a dual-stream model. *Journal of Communication*  
646 *Disorders*, 45(6), 393-402. doi: 10.1016/j.jcomdis.2012.06.004
- 647 Hickok, G., & Poeppel, D. (2007). Opinion - The cortical organization of speech processing.  
648 *Nature Reviews Neuroscience*, 8(5), 393-402. doi: 10.1038/nrn2113
- 649 Huth, A. G., de Heer, W. A., Griffiths, T. L., Theunissen, F. E., & Gallant, J. L. (2016). Natural  
650 speech reveals the semantic maps that tile human cerebral cortex. *Nature*, 532(7600),  
651 453.
- 652 Jeffers, J., & Barley, M. (1980). *Speechreading (lipreading)*: Charles C. Thomas Publisher.
- 653 Keitel, A., Gross, J., & Kayser, C. (2018). Perceptually relevant speech tracking in auditory and  
654 motor cortex reflects distinct linguistic features. *PLoS Biol*, 16(3), e2004473.
- 655 Keitel, A., Ince, R. A., Gross, J., & Kayser, C. (2017). Auditory cortical delta-entrainment  
656 interacts with oscillatory power in multiple fronto-parietal networks. *Neuroimage*, 147,  
657 32-42. doi: 10.1016/j.neuroimage.2016.11.062
- 658 Keitel, C., Keitel, A., Benwell, C. S. Y., Daube, C., Thut, G., & Gross, J. (2019). Stimulus-driven  
659 brain rhythms within the alpha band: The attentional-modulation conundrum. *Journal*  
660 *of Neuroscience*, 1633-1618.
- 661 Keitel, C., Thut, G., & Gross, J. (2017). Visual cortex responses reflect temporal structure of  
662 continuous quasi-rhythmic sensory stimulation. *Neuroimage*, 146, 58-70.



- 663 Koike, K. J., Hurst, M. K., & Wetmore, S. J. (1994). Correlation between the American-  
664 Academy-of-Otolaryngology-Head-and-Neck-Surgery 5-minute hearing test and  
665 standard audiological data. *Otolaryngology-Head and Neck Surgery*, *111*(5), 625-632.
- 666 Kyle, F. E., Campbell, R., & MacSweeney, M. (2016). The relative contributions of  
667 speechreading and vocabulary to deaf and hearing children's reading ability. *Research*  
668 *in developmental disabilities*, *48*, 13-24.
- 669 Lee, H., & Noppeney, U. (2011). Physical and Perceptual Factors Shape the Neural  
670 Mechanisms That Integrate Audiovisual Signals in Speech Comprehension. *The*  
671 *Journal of Neuroscience*, *31*(31), 11338-11350. doi: 10.1523/jneurosci.6510-10.2011
- 672 Leopold, D. A., & Logothetis, N. K. (1999). Multistable phenomena: changing views in  
673 perception. *Trends in cognitive sciences*, *3*(7), 254-264.
- 674 Liegeois, F., Connelly, A., Salmond, C., Gadian, D., Vargha-Khadem, F., & Baldeweg, T.  
675 (2002). A direct test for lateralization of language activation using fMRI: comparison  
676 with invasive assessments in children with epilepsy. *Neuroimage*, *17*(4), 1861-1867.
- 677 Luo, H., & Poeppel, D. (2007). Phase patterns of neuronal responses reliably discriminate  
678 speech in human auditory cortex. *Neuron*, *54*(6), 1001-1010. doi:  
679 10.1016/j.neuron.2007.06.004
- 680 Lyxell, B., & Ronnberg, J. (1989). Information-processing skill and speech-reading. *Br J Audiol*,  
681 *23*(4), 339-347.
- 682 MacLeod, A., & Summerfield, Q. (1987). Quantifying the contribution of vision to speech  
683 perception in noise. *British journal of audiology*, *21*(2), 131-141.
- 684 MacSweeney, M., Amaro, E., Calvert, G. A., Campbell, R., David, A. S., McGuire, P., . . .  
685 Brammer, M. J. (2000). Silent speechreading in the absence of scanner noise: an  
686 event-related fMRI study. *Neuroreport*, *11*(8), 1729-1733.
- 687 MacSweeney, M., Capek, C. M., Campbell, R., & Woll, B. (2008). The signing brain: the  
688 neurobiology of sign language. *Trends in cognitive sciences*, *12*(11), 432-440.
- 689 Maris, E., & Oostenveld, R. (2007). Nonparametric statistical testing of EEG- and MEG-data.  
690 *J Neurosci Methods*, *164*(1), 177-190. doi: 10.1016/j.jneumeth.2007.03.024
- 691 Mohammed, T., Campbell, R., Macsweeney, M., Barry, F., & Coleman, M. (2006).  
692 Speechreading and its association with reading among deaf, hearing and dyslexic  
693 individuals. *Clin Linguist Phon*, *20*(7-8), 621-630. doi: 10.1080/02699200500266745
- 694 Navarra, J., & Soto-Faraco, S. (2007). Hearing lips in a second language: visual articulatory  
695 information enables the perception of second language sounds. *Psychological*  
696 *research*, *71*(1), 4-12.
- 697 Nolte, G. (2003). The magnetic lead field theorem in the quasi-static approximation and its use  
698 for magnetoencephalography forward calculation in realistic volume conductors. *Phys*  
699 *Med Biol*, *48*(22), 3637-3652.
- 700 Oldfield, R. C. (1971). The assessment and analysis of handedness: the Edinburgh inventory.  
701 *Neuropsychologia*, *9*(1), 97-113.
- 702 Oostenveld, R., Fries, P., Maris, E., & Schoffelen, J. M. (2011). FieldTrip: Open source  
703 software for advanced analysis of MEG, EEG, and invasive electrophysiological data.  
704 *Comput Intell Neurosci*, *2011*, 156869. doi: 10.1155/2011/156869
- 705 Ozker, M., Yoshor, D., & Beauchamp, M. S. (2018). Frontal cortex selects representations of  
706 the talker's mouth to aid in speech perception. *eLife*, *7*, e30387.
- 707 Panzeri, S., Harvey, C. D., Piasini, E., Latham, P. E., & Fellin, T. (2017). Cracking the neural  
708 code for sensory perception by combining statistics, intervention, and behavior.  
709 *Neuron*, *93*(3), 491-507.
- 710 Parra, L. C., Spence, C. D., Gerson, A. D., & Sajda, P. (2005). Recipes for the linear analysis  
711 of EEG. *Neuroimage*, *28*(2), 326-341.
- 712 Paulesu, E., Perani, D., Blasi, V., Silani, G., Borghese, N., De Giovanni, U., . . . Fazio, F.  
713 (2003). A functional-anatomical model for lipreading. *Journal of neurophysiology*, *90*(3),  
714 2005-2013.
- 715 Peelle, J. E., & Sommers, M. S. (2015). Prediction and constraint in audiovisual speech  
716 perception. *Cortex*, *68*, 169-181. doi: 10.1016/j.cortex.2015.03.006

- 717 Pekkola, J., Ojanen, V., Autti, T., Jääskeläinen, I. P., Möttönen, R., Tarkiainen, A., & Sams, M.  
718 (2005). Primary auditory cortex activation by visual speech: an fMRI study at 3 T.  
719 *Neuroreport*, *16*(2), 125-128.
- 720 Pica, G., Piasini, E., Safaai, H., Runyan, C., Harvey, C., Diamond, M., . . . Panzeri, S. (2017).  
721 *Quantifying how much sensory information in a neural code is relevant for behavior*.  
722 Paper presented at the Advances in Neural Information Processing Systems.
- 723 Pitkow, X., Liu, S., Angelaki, D. E., DeAngelis, G. C., & Pouget, A. (2015). How can single  
724 sensory neurons predict behavior? *Neuron*, *87*(2), 411-423.
- 725 Poldrack, R. A., Baker, C. I., Durnez, J., Gorgolewski, K. J., Matthews, P. M., Munafò, M. R., .  
726 . . . Yarkoni, T. (2017). Scanning the horizon: towards transparent and reproducible  
727 neuroimaging research. *Nature Reviews Neuroscience*, *18*(2), 115-126.
- 728 Purushothaman, G., & Bradley, D. C. (2005). Neural population code for fine perceptual  
729 decisions in area MT. *Nature neuroscience*, *8*(1), 99.
- 730 Ralph, M. A. L., Jefferies, E., Patterson, K., & Rogers, T. T. (2017). The neural and  
731 computational bases of semantic cognition. *Nature Reviews Neuroscience*, *18*(1), 42.
- 732 Rimmele, J. M., Zion Golumbic, E., Schroger, E., & Poeppel, D. (2015). The effects of selective  
733 attention and speech acoustics on neural speech-tracking in a multi-talker scene.  
734 *Cortex*, *68*, 144-154. doi: 10.1016/j.cortex.2014.12.014
- 735 Ritchie, J. B., Tovar, D. A., & Carlson, T. A. (2015). Emerging object representations in the  
736 visual system predict reaction times for categorization. *PLoS computational biology*,  
737 *11*(6), e1004316.
- 738 Romo, R., Lemus, L., & de Lafuente, V. (2012). Sense, memory, and decision-making in the  
739 somatosensory cortical network. *Current opinion in neurobiology*, *22*(6), 914-919.
- 740 Runyan, C. A., Piasini, E., Panzeri, S., & Harvey, C. D. (2017). Distinct timescales of population  
741 coding across cortex. *Nature*, *548*, 92. doi: 10.1038/nature23020
- 742 Shinkareva, S. V., Malave, V. L., Mason, R. A., Mitchell, T. M., & Just, M. A. (2011).  
743 Commonality of neural representations of words and pictures. *Neuroimage*, *54*(3),  
744 2418-2425.
- 745 Simanova, I., Hagoort, P., Oostenveld, R., & Van Gerven, M. A. (2012). Modality-independent  
746 decoding of semantic information from the human brain. *Cerebral Cortex*, *24*(2), 426-  
747 434.
- 748 Simmons, J. P., Nelson, L. D., & Simonsohn, U. (2011). False-positive psychology:  
749 Undisclosed flexibility in data collection and analysis allows presenting anything as  
750 significant. *Psychological science*, *22*(11), 1359-1366.
- 751 Sumbly, W. H., & Pollack, I. (1954). Visual Contribution to Speech Intelligibility in Noise. *Journal*  
752 *of the Acoustical Society of America*, *26*(2), 212-215. doi: Doi 10.1121/1.1907309
- 753 Summerfield, Q. (1991). *Visual perception of phonetic gestures*. Paper presented at the  
754 Modularity and the motor theory of speech perception: Proceedings of a conference to  
755 honor Alvin M. Liberman.
- 756 Summerfield, Q. (1992). Lipreading and Audiovisual Speech-Perception. *Philosophical*  
757 *Transactions of the Royal Society of London Series B-Biological Sciences*, *335*(1273),  
758 71-78. doi: DOI 10.1098/rstb.1992.0009
- 759 Tsunada, J., Liu, A. S., Gold, J. I., & Cohen, Y. E. (2016). Causal contribution of primate  
760 auditory cortex to auditory perceptual decision-making. *Nat Neurosci*, *19*(1), 135-142.  
761 doi: 10.1038/nn.4195
- 762 Tye-Murray, N., Hale, S., Spehar, B., Myerson, J., & Sommers, M. S. (2014). Lipreading in  
763 school-age children: the roles of age, hearing status, and cognitive ability. *Journal of*  
764 *Speech, Language, and Hearing Research*, *57*(2), 556-565.
- 765 Tzourio-Mazoyer, N., Landeau, B., Papathanassiou, D., Crivello, F., Etard, O., Delcroix, N., . .  
766 . Joliot, M. (2002). Automated anatomical labeling of activations in SPM using a  
767 macroscopic anatomical parcellation of the MNI MRI single-subject brain. *Neuroimage*,  
768 *15*(1), 273-289. doi: 10.1006/nimg.2001.0978
- 769 Van Tasell, D. J., & Hawkins, D. B. (1981). Effects of guessing strategy on speechreading test  
770 scores. *Am Ann Deaf*, *126*(7), 840-844.



- 771 Van Veen, B. D., van Drongelen, W., Yuchtman, M., & Suzuki, A. (1997). Localization of brain  
772 electrical activity via linearly constrained minimum variance spatial filtering. *IEEE Trans*  
773 *Biomed Eng*, 44(9), 867-880. doi: 10.1109/10.623056  
774 Yi, A., Wong, W., & Eizenman, M. (2013). Gaze patterns and audiovisual speech  
775 enhancement. *Journal of Speech, Language, and Hearing Research*.
